# Supplementary figures and images for: Hydration of 3-hydroxy-4,4-dimethylglutaric acid with dimethylamine complex and its atmospheric implications
Source: Royal Society of Chemistry journal article supplement (doi:10.1039/c8cp04029j), 2018-01-01

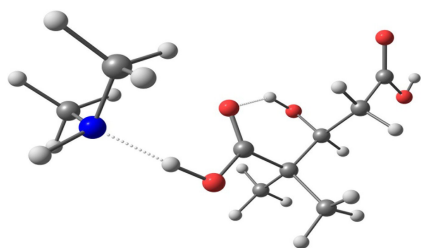

**2.0-a**

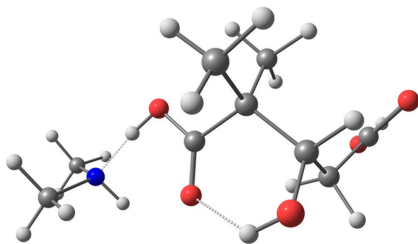

**2.0-b**

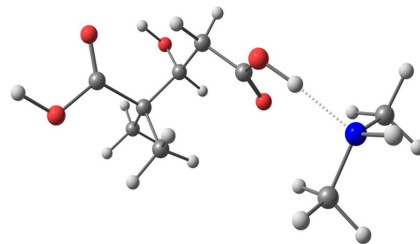

**2.0-c**

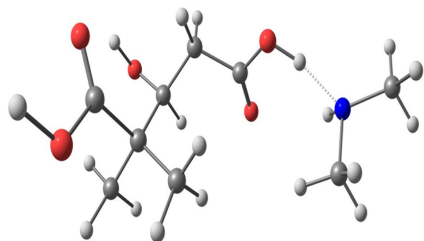

**2.0-d**

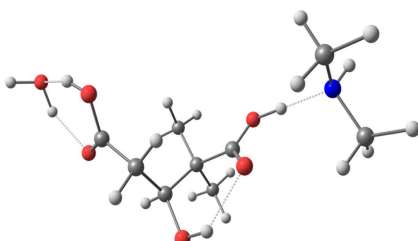

**2.1-a**

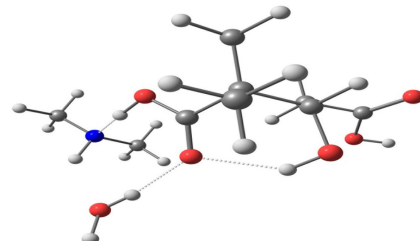

**2.1-b**

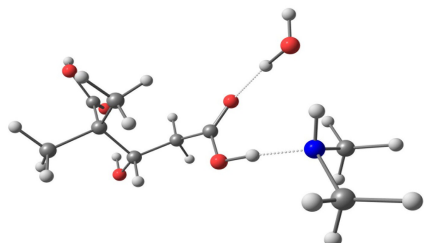

**2.1-c**

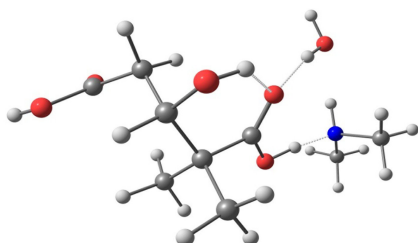

**2.1-d**

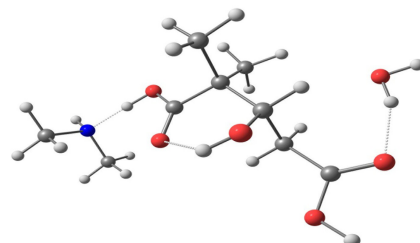

**2.1-e**

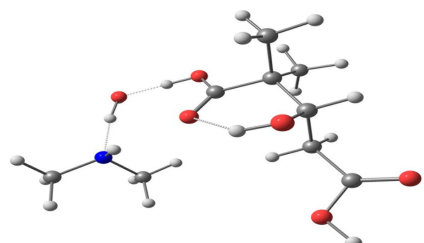

**2.1-f**

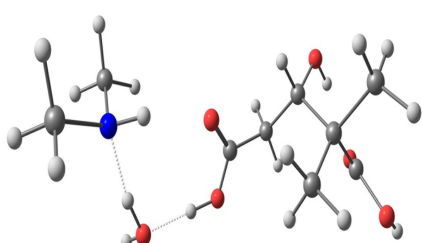

**2.1-g**

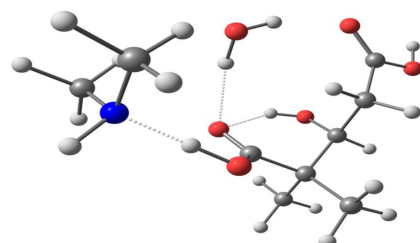

**2.1-h**

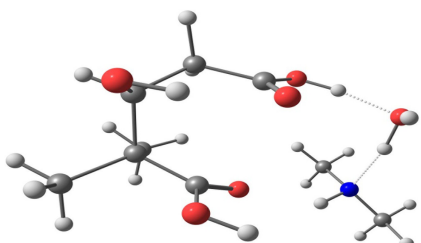

**2.1-i**

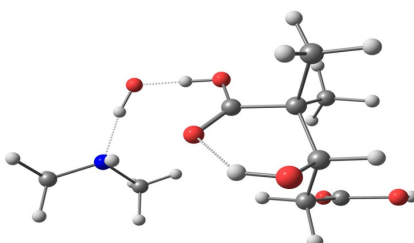

**2.1-j**

Supplement: c8cp04029j5.pdf [file c8cp04029j5.pdf]
